# Supplementary material
Source: ML conference proceedings conference paper supplement (https://proceedings.mlr.press/v80/bansal18a.html)
Supplement: Supplementary file 1 [file bansal18a-supp.pdf]

## Supplementary material

In the following sections we provide additional material (proofs and figures) that supplement our main results. Section A outlines the preliminary facts and notations that we use for the proofs. The subsequent sections provide the detailed proofs for respective lemmas and theorems. Figure 5 compares the theoretical upper bound estimate with the actual simulated values for modes of two layer DBMs ( $\mathcal{C}(n, m_1, m_2)$ ).

### A. Preliminary Facts and Notations

In the proofs that follow we use the following facts and notations:

1. The probability density function (pdf) of standard normal distribution  $\mathcal{N}(0, 1)$

$$\phi(x) = \frac{1}{\sqrt{2\pi}} \exp\left(-\frac{x^2}{2}\right)$$

2. The cumulative distribution function (cdf) of standard normal distribution

$$\Phi(x) = \int_{-\infty}^x \phi(t) dt = \frac{1}{2} \left[ 1 + \operatorname{erf}\left(\frac{x}{\sqrt{2}}\right) \right] \quad \text{where } \operatorname{erf}(x) = \frac{2}{\sqrt{\pi}} \int_0^x e^{-t^2} dt$$

3. The pdf of a skew normal distribution  $\hat{\mathcal{N}}$  with skew parameter  $\alpha$

$$f(x) = 2\phi(x)\Phi(\alpha x)$$

4. If  $X \sim \mathcal{N}(\mu, \sigma^2)$ ,  $a \in \mathbb{R}$ ,  $\alpha = \frac{a-\mu}{\sigma}$ , then  $X$  conditioned on  $X > a$  follows a truncated normal distribution with moments

$$\begin{aligned} \mathbb{E}[X|X > a] &= \mu + \sigma \frac{\phi(\alpha)}{Z} \\ \operatorname{Var}(X|X > a) &= \sigma^2 \left[ 1 + \alpha \frac{\phi(\alpha)}{Z} - \left( \frac{\phi(\alpha)}{Z} \right)^2 \right] \end{aligned}$$

where  $Z = 1 - \Phi(\alpha)$ .

5. *Squeeze Theorem*<sup>8</sup>: Let,  $\{a_m\}, \{b_m\}, \{c_m\}$  be sequences such that  $\forall m \geq m_0$  ( $m_0 \in \mathbb{R}$ )

$$a_m \leq b_m \leq c_m$$

Further, let  $\lim_{m \rightarrow \infty} a_m = \lim_{m \rightarrow \infty} c_m = L$ , then

$$\lim_{m \rightarrow \infty} b_m = L$$

### B. Proof of Lemma 1 (See page 4)

**Lemma 1.** A vector  $\mathbf{v}$  is perfectly reconstructible for an  $\operatorname{RBM}_{n,m}(\theta) \iff$  the state  $\{\mathbf{v}, \operatorname{up}(\mathbf{v})\}$  is one-flip stable.

*Proof.* Let  $\mathbf{h}^* = \operatorname{up}(\mathbf{v})$  (conditioning on  $\theta$  is implicit). If  $\mathbf{v}$  is perfectly reconstructible  $\implies \mathbf{v} = \arg \max_{\mathbf{v}} P(\mathbf{v}|\mathbf{h}^*) \implies \forall \mathbf{v}' \neq \mathbf{v}, P(\mathbf{v}', \mathbf{h}^*) < P(\mathbf{v}, \mathbf{h}^*)$ . Similarly since  $\mathbf{h}^* = \arg \max_{\mathbf{h}} P(\mathbf{h}|\mathbf{v}), \forall \mathbf{h}' \neq \mathbf{h}^*, P(\mathbf{v}, \mathbf{h}') < P(\mathbf{v}, \mathbf{h}^*)$ . Hence the state  $\{\mathbf{v}, \mathbf{h}^*\}$  is stable against any number of flips of visible units and against any number of flips of hidden units,  $\implies \{\mathbf{v}, \mathbf{h}^*\}$  is at least one-flip stable.

Conversely let  $\{\mathbf{v}^*, \mathbf{h}^*\}$  be one-flip stable. We shall prove by contradiction that  $\operatorname{up}(\mathbf{v}^*) = \mathbf{h}^*$  and  $\operatorname{down}(\mathbf{h}^*) = \mathbf{v}^*$ . Assume  $\operatorname{up}(\mathbf{v}^*) = \mathbf{h}' \neq \mathbf{h}^*$ . We use the fact that for an RBM the hidden units are conditionally independent of each other given the visible units. Thus  $\mathbf{h}' = \arg \max_{\mathbf{h}} P(\mathbf{h}|\mathbf{v}^*) = \{\arg \max_{h_j} P(h_j|\mathbf{v}^*)\}_{j=1}^m$ . Further  $P(\mathbf{h}'|\mathbf{v}^*) = \prod_{j=1}^m P(h'_j|\mathbf{v}^*)$ . Let  $k$  be an index such that  $h'_k \neq h_k^*$ . Since  $h'_k = \arg \max_{h_k} P(h_k|\mathbf{v}^*), \implies P(h'_k|\mathbf{v}^*) > P(h_k^*|\mathbf{v}^*)$ . Moreover,  $P(\mathbf{v}^*, \mathbf{h}^*) = P(\mathbf{v}^*)P(\mathbf{h}^*|\mathbf{v}^*) = P(\mathbf{v}^*) \prod_{j=1}^m P(h_j^*|\mathbf{v}^*)$ . Thus just by flipping  $h_k^*$  to  $h'_k$  we can increase the probability of the state  $\{\mathbf{v}^*, \mathbf{h}^*\}$ . This contradicts the one-flip stability hypothesis. Similarly using the conditional independence of visible units given the hidden units we can show that  $\operatorname{down}(\mathbf{h}^*) = \mathbf{v}^*$ .  $\square$

<sup>8</sup><http://mathonline.wikidot.com/the-squeeze-theorem-for-convergent-sequences>

### C. Proof of Lemma 2 (See page 5)

**Lemma 2.** For the set  $\mathbf{RBM}_{n,m}$ , if a given vector  $\mathbf{v}$  has  $r(\geq 1)$  ones,  $\mathbf{h} = \text{up}(\mathbf{v})$  has  $l$  ones and  $l \gg 1$ , then<sup>9</sup> for  $r > 1$ ,

$$\mathbb{E} [\mathbb{1}_{[\mathbf{v} \text{ is PR.}]}] \leq \left[ \frac{1}{2} - \frac{1}{2} \operatorname{erf} \left( -\sqrt{\frac{l}{\pi r - 2}} \right) \right]^r \left( \frac{1}{2} \right)^{n-r}.$$

For  $r = 1$ , the expression  $\mathbb{E} [\mathbb{1}_{[\mathbf{v} \text{ is PR.}]}]$  equates to  $(\frac{1}{2})^{n-1}$ . where  $\operatorname{erf}(x) = \frac{2}{\sqrt{\pi}} \int_{-x}^x e^{-t^2} dt$

*Proof.* We first note that given a visible vector  $\mathbf{v} \in \{0, 1\}^n$  the most likely configuration of the hidden vector

$$\left\{ h_j = [\text{up}(\mathbf{v})]_j = \mathbb{1}_{[\sum_{i=1}^n w_{ij} v_i > 0]} \right\}_{j=1}^m$$

Likewise given a hidden vector  $\mathbf{h}$ , the most likely visible vector

$$\left\{ v_i = [\text{down}(\mathbf{h})]_i = \mathbb{1}_{[\sum_{j=1}^m w_{ij} h_j > 0]} \right\}_{i=1}^n$$

**Case 1:**  $r = 1$

By symmetry it can be assumed  $v_1 = 1$ , and  $v_i = 0 (\forall i > 1)$ . Then  $\{h_j = \mathbb{1}_{[w_{1j} > 0]}\}_{j=1}^m$ . Since each of  $w_{1j}$  is i.i.d. as per  $\mathcal{N}(0, \sigma^2)$ ,  $h_j$  is a Bernoulli random variable with  $P(h_j = 1) = \frac{1}{2}$ . Again by symmetry it is assumed the first  $l$  units  $\{h_j\}_{j=1}^l$  are one. Then the most likely *reconstructed* visible vector is given by  $\left\{ \hat{v}_i = \mathbb{1}_{[X_i = \sum_{j=1}^l w_{ij} > 0]} \right\}_{i=1}^n$ . Since  $w_{1j} > 0$  for all  $1 \leq j \leq l \implies \hat{v}_1 = 1$ . Also, for all  $i > 1$ ,  $w_{ij} \sim \mathcal{N}(0, \sigma^2) \implies X_i \sim \mathcal{N}(0, l\sigma^2) \implies \{\hat{v}_i\}_{i>1}$  is a Bernoulli random variable with  $\{P[\hat{v}_i = 1] = \frac{1}{2}\}_{i=2}^n$ . The result then follows by mutual independence of  $\hat{v}_i$ .

**Case 2:**  $r > 1$

For  $r(> 1)$  ones in  $\mathbf{v}$  and  $l$  ones in  $\mathbf{h} = \text{up}(\mathbf{v})$  the problem of computing  $\{P[\hat{v}_i = 1]\}_{i=1}^r$  can be reformulated in terms of matrix row and column sums, viz, given  $W \in \mathbb{R}^{r \times l}$  where all entries  $w_{ij} \sim \mathcal{N}(0, \sigma^2)$  are i.i.d. and given that all the column sums  $\{C_j = \sum_{i=1}^r w_{ij} > 0\}_{j=1}^l$ , to compute the probability that all the row sums are positive, i.e.,  $\left\{ R_i = \sum_{j=1}^l w_{ij} > 0 \right\}_{i=1}^r$ .

Using properties of normal distribution it can be shown that conditioned on the fact that  $C_j > 0$ , the posterior distribution of  $w_{ij}$  shall be *skew-normal* with mean  $\mu_{ij} = \sigma \sqrt{\frac{2}{\pi r}}$  and variance  $\sigma_{ij}^2 = \sigma^2 \left(1 - \frac{2}{\pi r}\right)$ . Since the random variables  $\{w_{ij} | C_j > 0\}_{j=1}^l$  are independent the posterior mean of  $R_i$  shall be  $\tilde{\mu}_i = l\sigma \sqrt{\frac{2}{\pi r}}$  and the posterior variance  $\tilde{\sigma}_i^2 = l\sigma^2 \left(1 - \frac{2}{\pi r}\right)$ . Since  $l \gg 1$  by *Central Limit Theorem*  $R_i$  follow a normal distribution. Since the  $R_i$  are negatively correlated (proof follows) and  $\{P[\hat{v}_i = 1] = \frac{1}{2}\}_{i>r}$  by similar reasoning as in Case 1 we get our desired upper bound.

**Negatively Correlated  $R_i$ 's:** Conditioned on the fact  $\{C_j > 0\}_{j=1}^l$  the random variables  $\{R_i\}_{i=1}^r$  are not independent. They are negatively correlated because for all  $R_i, R_t (t \neq i)$ ,

$$P(R_i > 0 | \{C_j > 0\}_{j=1}^l, R_t > 0) < P(R_i > 0 | \{C_j > 0\}_{j=1}^l)$$

Hence the expression given in Lemma 2 is an upper bound since we have neglected the negative correlation among the  $R_i$  and in the process over-estimated the probabilities. □

<sup>9</sup>Here  $l \gg 1$  means  $l$  is atleast 50 hidden units, which according to us is a reasonable assumption.

## D. Proof of Lemma 3 (See page 5)

**Lemma 3.** For the set  $\mathbf{RBM}_{n,m}$ , if  $\mathbf{v}$  has  $r(> 1)$  ones,  $\mathbf{h} = \text{up}(\mathbf{v})$  has  $l$  ones, then  $\exists \mu_c, \tilde{\mu}_c, \sigma_c, \tilde{\sigma}_c \in \mathbb{R}_+$  such that conditioned on  $\{R_t > 0\}_{t=1}^{i-1}, C_j > 0$ , the moments of posterior distribution of  $w_{ij}$  is given by

$$\begin{aligned} \mathbb{E} [w_{ij} | \{R_t > 0\}_{t=1}^{i-1}, C_j > 0] &= (\tilde{\mu}_c - \mu_c) \frac{\sigma_c^2}{\sigma_c^2} \\ \text{Var} [w_{ij} | \{R_t > 0\}_{t=1}^{i-1}, C_j > 0] &= \tilde{\sigma}_c^2 \left( \frac{\sigma_c^2}{\sigma_c^2} \right)^2 + \sigma^2 \beta \end{aligned}$$

where  $\beta = \left(1 - \frac{\sigma_c^2}{\sigma^2}\right)$

*Proof.* The conditional distribution for  $R_1 = \sum_{j=1}^l w_{1j}$  is obtained from the proof of Lemma 2.

$$(R_1 | \{C_j > 0\}_{j=1}^l) \sim \mathcal{N}(\tilde{\mu}_1, \tilde{\sigma}_1^2)$$

where  $\tilde{\mu}_1 = l\sigma\sqrt{\frac{2}{\pi r}}$ ,  $\tilde{\sigma}_1^2 = l\sigma^2\left(1 - \frac{2}{\pi r}\right)$ . Using similar arguments as in proof of Lemma 2, conditioned on  $R_t > 0$  the posterior distribution of  $w_{tj}$  shall be skew normal  $\hat{\mathcal{N}}\left[\sigma\sqrt{\frac{2}{\pi l}}, \sigma^2\left(1 - \frac{2}{\pi l}\right)\right]$ . Then conditioned on  $\{R_t > 0\}_{t=1}^{i-1}, C_j$  shall be distributed as per skew normal

$$(C_j | \{R_t > 0\}_{t=1}^{i-1}) \sim \hat{\mathcal{N}}(\mu_c, \sigma_c^2)$$

where

$$\mu_c = (i-1)\sigma\sqrt{\frac{2}{\pi l}} \text{ and } \sigma_c^2 = (i-1)\sigma^2\left(1 - \frac{2}{\pi l}\right) + (r-i+1)\sigma^2$$

Here we approximate the above distribution to be Normal since if  $i$  is large then *Central Limit Theorem* would be applicable, otherwise the normally distributed variables  $\{w_{kj}\}_{k=i}^r$  would dominate the sum. Then conditioned on  $\{R_t > 0\}_{t=1}^{i-1}, C_j > 0$ ,  $C_j$  shall be distributed as per truncated normal distribution (Barr & Sherrill, 1999) with moments

$$\begin{aligned} \mathbb{E} [C_j | \{R_t > 0\}_{t=1}^{i-1}, C_j > 0] &= \tilde{\mu}_c = \mu_c + \sigma_c \frac{\phi}{Z} \\ \text{Var} [C_j | \{R_t > 0\}_{t=1}^{i-1}, C_j > 0] &= \tilde{\sigma}_c^2 = \sigma_c^2 \left[1 - \frac{\mu_c \phi}{\sigma_c Z} - \frac{\phi^2}{Z^2}\right] \end{aligned}$$

where  $\sigma_c^2 = (i-1)\sigma^2\left(1 - \frac{2}{\pi l}\right) + (r-i+1)\sigma^2$ ,

$\mu_c = (i-1)\sigma\sqrt{\frac{2}{\pi l}}$ ,  $Z = \frac{1}{2} - \frac{1}{2} \text{erf}\left(-\frac{\mu_c}{\sigma_c\sqrt{2}}\right)$  and  $\phi = \frac{1}{\sqrt{2\pi}} e^{\left(-\frac{\mu_c^2}{2\sigma_c^2}\right)}$ . Then  $\mathbb{E} [w_{ij} | \{R_t > 0\}_{t=1}^{i-1}, C_j = c] = (c - \mu_c) \frac{\sigma_c^2}{\sigma_c^2}$  and  $\text{Var} [w_{ij} | \{R_t > 0\}_{t=1}^{i-1}, C_j = c] = \sigma_c^2 \left(1 - \frac{\sigma_c^2}{\sigma^2}\right)$ . The result then follows from Laws of total expectation and total variance respectively.  $\square$

*Remark.* The random variables  $\{\tilde{w}_{ij} = w_{ij} | \{R_t > 0\}_{t=1}^{i-1}, C_j > 0\}_{j=1}^l$  shall be negatively correlated with one another so we should subtract the covariance terms while determining the effective variance of  $R_i = \sum_{j=1}^l \tilde{w}_{ij}$ . Thus if we don't subtract the covariance terms from the variance we would get a lower bound on the posterior probability of  $R_i$  being positive. However it is close as can be seen in Figure 3.

## E. Proof of Theorem 1 (See page 5)

**Theorem 1. (ISC of  $\mathbf{RBM}_{n,m}$ )** There exist non-trivial functions  $L(n, m), U(n, m) : \mathbb{Z} \times \mathbb{Z} \rightarrow \mathbb{R}_+$  such that **ISC** of the set  $\mathbf{RBM}_{n,m}$  obeys the following inequality.

$$\frac{1}{n} \log_2(L(n, m)) \leq \mathcal{C}(n, m) \leq \frac{1}{n} \log_2(U(n, m))$$

*Proof.* The upper bound follows from Lemma 2 and applying linearity of expectation.

$$U_{n,m} = \sum_{r=1}^n \binom{n}{r} \sum_{l=1}^m \binom{m}{l} \left(\frac{1}{2}\right)^m \left[ \frac{1}{2} - \frac{1}{2} \operatorname{erf} \left( -\sqrt{\frac{l}{\pi r - 2}} \right) \right]^r \left(\frac{1}{2}\right)^{n-r}$$

For lower bound, we use Lemma 3. We have  $\mathbb{E}[w_{ij} | \{R_t > 0\}_{t=1}^{i-1}, C_j > 0] = \tilde{\mu}_i(r, l)$  and  $\operatorname{Var}[w_{ij} | \{R_t > 0\}_{t=1}^{i-1}, C_j > 0] = (\tilde{\sigma}_i(r, l))^2$ . Thus posterior mean and variance of  $\{R_i\}_{i=1}^r$  shall be  $l\tilde{\mu}_i(r, l)$  and  $l(\tilde{\sigma}_i(r, l))^2$  respectively. Then summing over all possibilities of  $l$  and applying linearity of expectation we get the lower bound.

$$L_{n,m} = \sum_{r=1}^n \binom{n}{r} \sum_{l=1}^m \binom{m}{l} \left(\frac{1}{2}\right)^m \left\{ \prod_{i=1}^r \left[ \frac{1}{2} - \frac{1}{2} \operatorname{erf} \left( -\frac{\tilde{\mu}_i(r, l) \sqrt{\frac{l}{2}}}{\tilde{\sigma}_i(r, l)} \right) \right] \right\} \left(\frac{1}{2}\right)^{n-r}$$

□

## F. Proof of Corollary 1 (See page 5)

**Corollary 1. (Large  $m$  limit)** For the set  $\mathbf{RBM}_{n,m}$ ,  $\lim_{m \rightarrow \infty} \mathcal{C}(n, m) = \log_2 1.5 = 0.585$  where  $\mathcal{C}(n, m)$  is defined in Theorem 1.

*Proof.* We shall show that  $\lim_{m \rightarrow \infty} U_{n,m} \leq 1.5^n$  and  $\lim_{m \rightarrow \infty} L_{n,m} \geq 1.5^n$ . Then using *Squeeze Theorem* and the fact that limits preserve inequalities the result shall hold.

$$\lim_{m \rightarrow \infty} U_{n,m} = \lim_{m \rightarrow \infty} \left\{ \sum_{r=1}^n \binom{n}{r} \sum_{l=1}^m \binom{m}{l} \left(\frac{1}{2}\right)^m \left[ \frac{1}{2} - \frac{1}{2} \operatorname{erf} \left( -\sqrt{\frac{l}{\pi r - 2}} \right) \right]^r \left(\frac{1}{2}\right)^{n-r} \right\}$$

If we replace the  $l$  inside the erf function by  $m$  then we would be increasing the value of the expression since  $m \geq l$ . Thus

$$\begin{aligned} \lim_{m \rightarrow \infty} U_{n,m} &\leq \lim_{m \rightarrow \infty} \left\{ \sum_{r=1}^n \binom{n}{r} \sum_{l=1}^m \binom{m}{l} \left(\frac{1}{2}\right)^m \left(\frac{1}{2}\right)^r \left[ 1 - \operatorname{erf} \left( -\sqrt{\frac{m}{\pi r - 2}} \right) \right]^r \left(\frac{1}{2}\right)^{n-r} \right\} \\ &= \lim_{m \rightarrow \infty} \sum_{r=1}^n \binom{n}{r} \sum_{l=1}^m \binom{m}{l} \left(\frac{1}{2}\right)^m \left(\frac{1}{2}\right)^r [2]^r \left(\frac{1}{2}\right)^{n-r} \\ &= 1.5^n \end{aligned}$$

To get a lower bound on  $L_{n,m}$  we choose a small fixed constant  $\epsilon > 0$ . Then

$$\begin{aligned} \lim_{m \rightarrow \infty} L_{n,m} &= \lim_{m \rightarrow \infty} \sum_{r=1}^n \binom{n}{r} \sum_{l=1}^m \binom{m}{l} \left(\frac{1}{2}\right)^m \left\{ \prod_{i=1}^r \left[ \frac{1}{2} - \frac{1}{2} \operatorname{erf} \left( -\frac{\tilde{\mu}_i(r, l) \sqrt{\frac{l}{2}}}{\tilde{\sigma}_i(r, l)} \right) \right] \right\} \left(\frac{1}{2}\right)^{n-r} \\ &\geq \lim_{m \rightarrow \infty} \sum_{r=1}^n \binom{n}{r} \sum_{l=m\epsilon}^m \binom{m}{l} \left(\frac{1}{2}\right)^m \left\{ \prod_{i=1}^r \left[ \frac{1}{2} - \frac{1}{2} \operatorname{erf} \left( -\frac{\tilde{\mu}_i(r, l) \sqrt{\frac{l}{2}}}{\tilde{\sigma}_i(r, l)} \right) \right] \right\} \left(\frac{1}{2}\right)^{n-r} \\ &\geq \lim_{m \rightarrow \infty} \sum_{r=1}^n \binom{n}{r} \sum_{l=m\epsilon}^m \binom{m}{l} \left(\frac{1}{2}\right)^m \left\{ \prod_{i=1}^r \left[ \frac{1}{2} - \frac{1}{2} \operatorname{erf} \left( -\frac{\tilde{\mu}_i(r, l) \sqrt{\frac{m\epsilon}{2}}}{\tilde{\sigma}_i(r, l)} \right) \right] \right\} \left(\frac{1}{2}\right)^{n-r} \end{aligned}$$

Since  $\tilde{\mu}_i(r, l)$  and  $\tilde{\sigma}_i(r, l)$  are non-zero finite quantities regardless of the value of  $l$  and  $m$  and  $\epsilon$  is a fixed non-zero constant,

$$\begin{aligned} \lim_{m \rightarrow \infty} L_{n,m} &\geq \lim_{m \rightarrow \infty} \sum_{r=1}^n \binom{n}{r} \sum_{l=m\epsilon}^m \binom{m}{l} \left(\frac{1}{2}\right)^m \left\{ \prod_{i=1}^r \left[ \frac{1}{2} - \frac{1}{2} \operatorname{erf} \left( \underbrace{-\frac{\tilde{\mu}_i(r, l) \sqrt{\frac{m\epsilon}{2}}}{\tilde{\sigma}_i(r, l)}}_{\rightarrow -\infty} \right) \right] \right\} \left(\frac{1}{2}\right)^{n-r} \\ &= \lim_{m \rightarrow \infty} \sum_{r=1}^n \binom{n}{r} \underbrace{\sum_{l=m\epsilon}^m \binom{m}{l} \left(\frac{1}{2}\right)^m}_{\operatorname{Prob}(l > m\epsilon)} \left\{ \left(\frac{1}{2}\right)^r [2]^r \right\} \left(\frac{1}{2}\right)^{n-r} \end{aligned}$$

Since  $\epsilon$  is an arbitrarily small number that we have chosen and  $l$  denotes the number of successes in  $m$  Bernoulli trials,  $\operatorname{Prob}(l > m\epsilon) = 1$ .

$$\begin{aligned} &\implies \lim_{m \rightarrow \infty} L_{n,m} \geq 1.5^n \\ &\implies 1.5^n \leq \lim_{m \rightarrow \infty} L_{n,m} \leq \lim_{m \rightarrow \infty} \mathcal{C}(n, m) \leq \lim_{m \rightarrow \infty} U_{n,m} \leq 1.5^n \end{aligned}$$

□

## G. Proof of Theorem 2 (See page 6)

**Theorem 2. (ISC of  $\mathbf{RBM}_{n,m_1,m_2}$ )** For an  $\mathbf{RBM}_{n,m_1,m_2}$  ( $n, m_1 > 0$  and  $m_2 \geq 0$ ), if we denote  $u = \max(m_1, n + m_2)$ ,  $l = \min(m_1, n + m_2)$ , then

$$\mathcal{C}(n, m_1, m_2) \leq \frac{1}{n} \log_2 S$$

whenever  $S < \gamma 2^n$ ,  $S = \left[ 1 - \frac{1}{2} \operatorname{erf} \left( -\sqrt{\frac{u}{\pi l - 4}} \right) \right]^l$

*Proof.* As shown in Figure 2 we construct a single layer  $\mathbf{RBM}_{n+m_2,m_1}$  that has the same bipartite connections as  $\mathbf{RBM}_{n,m_1,m_2}$ . The expected number of perfectly reconstructible vectors for the single layer RBM can then be obtained from Equation 10.

$$\begin{aligned} \mathcal{C}(n + m_2, m_1) &\leq \frac{1}{n} \log_2 U_{n+m_2,m_1} = \frac{1}{n} \log_2 S \\ &= \frac{1}{n} \log_2 \left[ 1 - \frac{1}{2} \operatorname{erf} \left( -\sqrt{\frac{u}{\pi l - 4}} \right) \right]^l \end{aligned}$$

However this quantity is an overestimate. This counts the number of pairs of vectors  $\{\mathbf{v}, \mathbf{h}_2\}$  such that  $\begin{pmatrix} \mathbf{v} \\ \mathbf{h}_2 \end{pmatrix}$  is perfectly reconstructible for  $\mathbf{RBM}_{n+m_2,m_1}$ . Among these, there can be vectors like  $\begin{pmatrix} \mathbf{v}^{(1)} \\ \mathbf{h}_2^{(1)} \end{pmatrix}$  and  $\begin{pmatrix} \mathbf{v}^{(2)} \\ \mathbf{h}_2^{(2)} \end{pmatrix}$  where  $\mathbf{v}^{(1)} = \mathbf{v}^{(2)}$  resulting in repetitions. Assuming such vectors  $\mathbf{v}^{(i)}$  are uniformly distributed among the  $2^n$  possibilities, we approximate the problem to the following. Given  $2^n$  distinct vectors, we make  $S$  draws from them uniformly randomly with replacement. The expected number of distinct vectors that result is given by  $2^n \left[ 1 - \left(1 - \frac{1}{2^n}\right)^S \right]$ . If  $S < \gamma 2^n$  then binomial approximation can be applied and we get the desired result. □

## H. Proof of Corollary 2 (See page 6)

**Corollary 2. (Layer 1 Wide, Layer 2 Narrow)** For an  $\mathbf{RBM}_{n,m_1,m_2}$  ( $n, m_1 > 0$  and  $m_2 \geq 0$ ), if  $\alpha_1 = \frac{m_1}{n} > \frac{1}{\gamma}$  and  $\alpha_2 = \frac{m_2}{n} < \gamma$  then

$$\mathcal{C}(n, m_1, m_2) \leq (1 + \alpha_2) \log_2(1.5)$$

*Proof.* For  $\alpha_1 > \frac{1}{\gamma}$ ,  $S = \left[1 - \frac{1}{2} \operatorname{erf} \left( -\sqrt{\frac{n\alpha_1}{\pi n(1+\alpha_2)-4}} \right)\right]^{n(1+\alpha_2)} = 1.5^{n(1+\alpha_2)}$ .

Moreover for  $\alpha_2 < \gamma$ , since  $S = 1.5^{n(1+\alpha_2)} < 1.5^{n(1+\gamma)} = 2^{n(1+\gamma) \log_2(1.5)} = 2^{0.614n} (< \gamma 2^n$  for reasonable choices of  $n$ ), we can apply binomial approximation and the result follows.  $\square$

## I. Proof of Corollary 3 (See page 6)

**Corollary 3. (Fixed budget on parameters)** For an **RBM** $_{n,m_1,m_2}$  ( $n, m_1 > 0$  and  $m_2 \geq 0$ ), if there is a budget of  $cn^2$  on the total number of parameters, i.e.  $\alpha_1(1 + \alpha_2) = c$  then the maximum possible **ISC**,  $\max_{\alpha_1, \alpha_2} \mathcal{C}(n, \alpha_1, \alpha_2) \leq \tilde{U}(n, \alpha_1^*, \alpha_2^*)$  where

$$\tilde{U}(n, \alpha_1^*, \alpha_2^*) = \begin{cases} \min(1, \sqrt{c} \log_2(1.29)) & \text{if } c \geq 1 \\ c \log_2 \left[ 1 - \frac{1}{2} \operatorname{erf} \left( -\sqrt{\frac{1}{\pi c}} \right) \right] & \text{if } c < 1 \end{cases}$$

*Proof.* We consider two regimes.

**Regime 1** ( $\alpha_1 \leq 1 + \alpha_2$ )

In this regime using Theorem 2,  $\mathcal{C}(n, m_1, m_2) \leq \frac{1}{n} \log_2 S$  where

$$S = \left[ 1 - \frac{1}{2} \operatorname{erf} \left( -\sqrt{\frac{u}{\pi l - \underbrace{4}_{=c(1)}}}} \right) \right]^l = \left[ 1 - \frac{1}{2} \operatorname{erf} \left( -\sqrt{\frac{\frac{nc}{\alpha_1}}{\pi n \alpha_1}} \right) \right]^{n\alpha_1} = \left[ 1 - \frac{1}{2} \operatorname{erf} \left( -\sqrt{\frac{c}{\pi \alpha_1^2}} \right) \right]^{n\alpha_1}$$

We will prove that  $\frac{\partial S}{\partial \alpha_1} > 0$ . Taking natural logarithm on both sides,

$$\ln S = n\alpha_1 \ln \left[ 1 - \frac{1}{2} \operatorname{erf} \left( -\sqrt{\frac{c}{\pi \alpha_1^2}} \right) \right]$$

$$\begin{aligned} \frac{1}{S} \frac{\partial S}{\partial \alpha_1} &= n \ln \left[ 1 - \frac{1}{2} \operatorname{erf} \left( -\sqrt{\frac{c}{\pi \alpha_1^2}} \right) \right] + \frac{n\alpha_1}{1 - \frac{1}{2} \operatorname{erf} \left( -\sqrt{\frac{c}{\pi \alpha_1^2}} \right)} \left[ -\frac{1}{\sqrt{\pi}} \exp \left( -\frac{c}{\pi \alpha_1^2} \right) \right] \left( \frac{1}{\alpha_1^2} \sqrt{\frac{c}{\pi}} \right) \\ &= n \ln \left[ 1 - \frac{1}{2} \operatorname{erf} \left( -\sqrt{\frac{c}{\pi \alpha_1^2}} \right) \right] - \frac{n\alpha_1}{1 - \frac{1}{2} \operatorname{erf} \left( -\sqrt{\frac{c}{\pi \alpha_1^2}} \right)} \left[ \frac{1}{\sqrt{\pi}} \exp \left( -\frac{c}{\pi \alpha_1^2} \right) \right] \left( \frac{1}{\alpha_1^2} \sqrt{\frac{c}{\pi}} \right) \end{aligned}$$

Now since  $c = \alpha_1(1 + \alpha_2)$  and we are in the regime  $\alpha_1 \leq 1 + \alpha_2$ ,  $\implies \frac{c}{\alpha_1^2} \geq 1$ . Hence

$$\begin{aligned} \frac{1}{S} \frac{\partial S}{\partial \alpha_1} &\geq n \ln \left[ 1 - \frac{1}{2} \operatorname{erf} \left( -\sqrt{\frac{1}{\pi}} \right) \right] - \frac{\frac{n}{\sqrt{\pi}}}{1 - \frac{1}{2} \operatorname{erf} \left( -\sqrt{\frac{1}{\pi}} \right)} \underbrace{\left[ \left( \sqrt{\frac{c}{\pi \alpha_1^2}} \right) \exp \left( -\frac{c}{\pi \alpha_1^2} \right) \right]}_{x \exp(-x^2) \leq 0.428} \\ &= 0.252n - 0.187n \\ \implies \frac{\partial S}{\partial \alpha_1} &> 0 \end{aligned}$$

Similarly we can show that in the **Regime**  $\alpha_1 > 1 + \alpha_2$ ,  $\frac{\partial S}{\partial \alpha_2} > 0$  which would imply  $\frac{\partial S}{\partial \alpha_1} < 0$ .

Hence the maximum occurs when either  $\alpha_1 = 1 + \alpha_2 = \sqrt{c}$  ( $c \geq 1$ ) or  $\alpha_1 = c$  ( $c < 1$ ).  $\square$

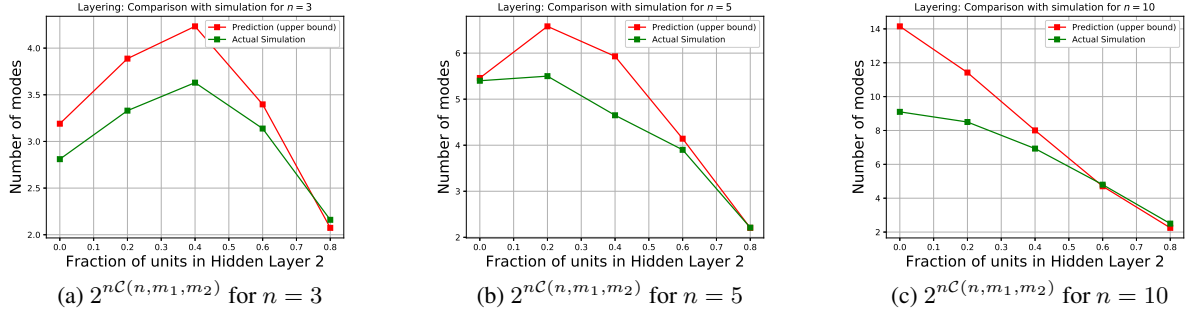

Figure 5. Comparison chart of the upper estimates with the actual simulation value for two layered RBM with  $m_1 + m_2 = 10$ . The values are plotted for various values of  $\beta = \frac{m_2}{m_1}$ .

## J. Relationship between modes of joint and marginal distribution

### Proposition

Let  $\{\mathbf{v}_r\}_{r=1}^k$  be visible vectors such that for each pair of vectors  $\{\mathbf{v}_i, \mathbf{v}_j\}$  in  $\{\mathbf{v}_r\}_{r=1}^k$ ,  $d_H(\mathbf{v}_i, \mathbf{v}_j) \geq 2$ . For an  $\text{RBM}_{n,m_1,\dots,m_L}(\theta)$  that fits the input distribution  $p(\mathbf{v}) = \frac{1}{k} \sum_{i=1}^k \delta(\mathbf{v} - \mathbf{v}_i)$ , if a vector  $\mathbf{v}$  is a mode of marginal distribution, then there exist vectors  $\{\mathbf{h}_l^*\}_{l=1}^L$  such that  $(\mathbf{v}, \{\mathbf{h}_l^*\}_{l=1}^L)$  is a mode of joint distribution  $p(\mathbf{v}, \{\mathbf{h}_l\}_{l=1}^L)$ .

*Proof.* Since  $v$  is a mode,  $\implies p(\mathbf{v}) = \frac{1}{k} > 0$ .

Further, let  $\{\mathbf{h}_l^*\}_{l=1}^L = \arg \max_{\{\mathbf{h}_l\}} P(\mathbf{v}, \{\mathbf{h}_l\}_{l=1}^L)$ , that is, the state  $(\mathbf{v}, \{\mathbf{h}_l^*\}_{l=1}^L)$  is stable against flip of any **hidden** unit<sup>10</sup>. Moreover, since for all neighbours  $\mathbf{v}'$  of  $\mathbf{v}$ ,  $p(\mathbf{v}') = 0 \implies p(\mathbf{v}', \{\mathbf{h}_l^*\}_{l=1}^L) = 0$ , it implies that  $(\mathbf{v}, \{\mathbf{h}_l^*\}_{l=1}^L)$  is stable against flip of any visible unit also.

Thus  $(\mathbf{v}, \{\mathbf{h}_l^*\}_{l=1}^L)$  is one-flip stable and hence a mode of the joint distribution.  $\square$

<sup>10</sup>Here we assume that energy function values of any two distinct configurations are different.
